# Supplementary material for: Synthesis of a one-dimensional atomic crystal of vanadium selenide (V2Se9)
Source: Royal Society of Chemistry journal article supplement (doi:10.1039/c8ra06398b), 2018-01-01
Supplement: c8ra06398b1.pdf [file c8ra06398b1.pdf]

## Electronic Supplementary Information

### Synthesis of One-dimensional Atomic Crystal of Vanadium Selenide ( $V_2Se_9$ )

Seungbae Oh<sup>a,†</sup>, Sudong Chae<sup>a,†</sup>, Bum Jun Kim<sup>b</sup>, Kyung Hwan Choi<sup>b</sup>, Woo-Sung Jang<sup>c</sup>, Jimin Jang<sup>b</sup>, Yasmin Hussain<sup>a</sup>, Dong Kyu Lee<sup>d</sup>, Young-Min Kim<sup>c,e</sup>, Hak Ki Yu<sup>d,\*</sup>, and Jae-Young Choi<sup>a,b,\*</sup>

<sup>a</sup>*School of Advanced Materials Science & Engineering, Sungkyunkwan University, Suwon 16419, Republic of Korea.*

<sup>b</sup>*SKKU Advanced Institute of Nanotechnology (SAINT), Sungkyunkwan University, Suwon 16419, Republic of Korea*

<sup>c</sup>*Department of Energy Science, Sungkyunkwan University, Suwon 16419, Republic of Korea.*

<sup>d</sup>*Department of Materials Science and Engineering & Department of Energy Systems Research, Ajou University, Suwon 16499, Republic of Korea*

<sup>e</sup>*Center for Integrated Nanostructure Physics, Institute for Basic Science (IBS), Suwon 16419, Republic of Korea*

† S. Oh and S. Chae contributed equally to this work.

\*To whom correspondence should be addressed. E-mail: jy.choi@skku.edu (J. Y. Choi), hakkiyu@ajou.ac.kr (H. K. Yu)

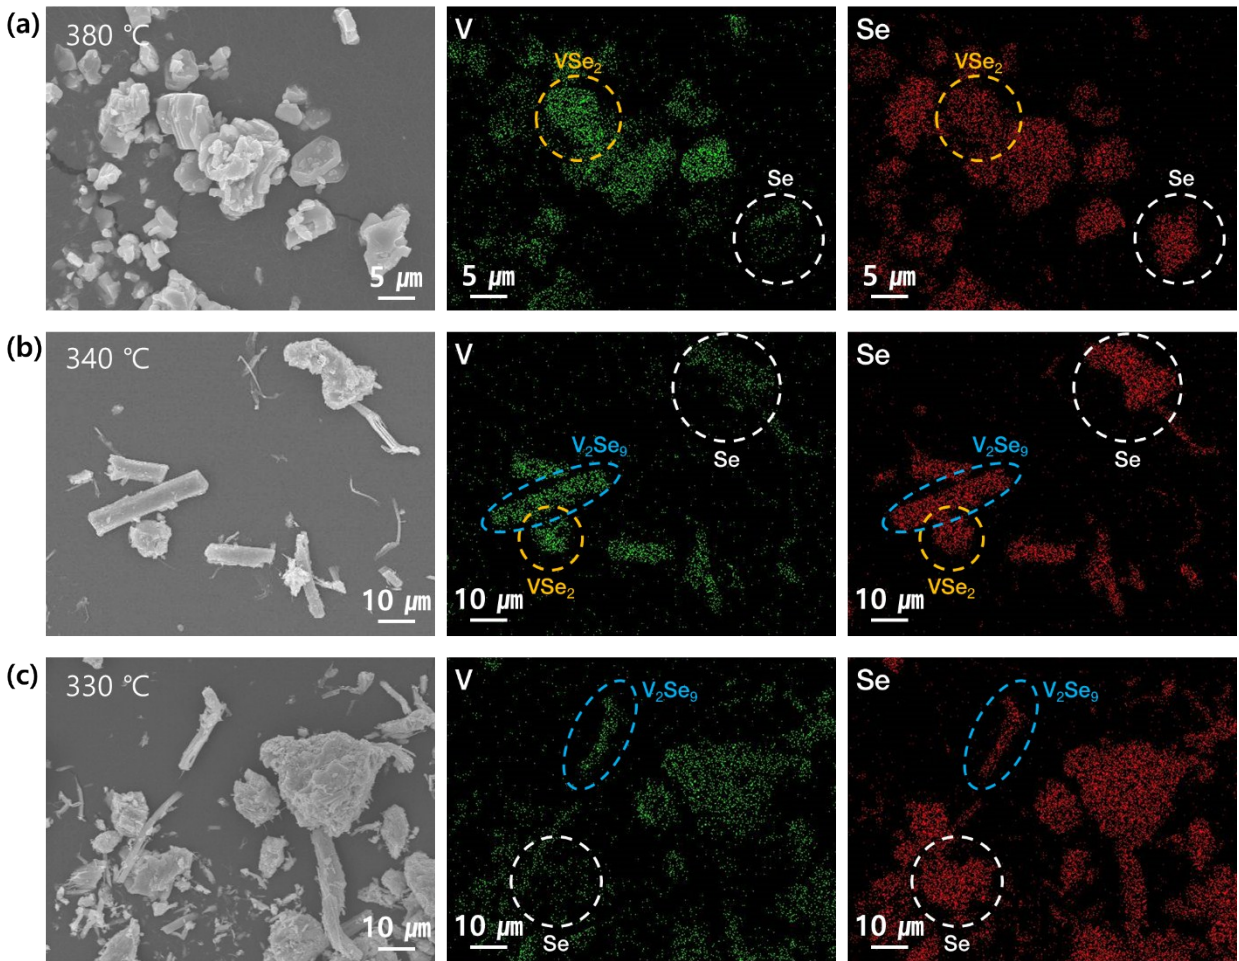

**Fig. S1** EDS mapping of the as-synthesized samples in Fig 2. which is synthesized at (a) 380 °C, (b) 340 °C, (c) 330 °C (V:Se ratio is 2: 12.6). (left: SEM image, middle: EDS mapping of vanadium, right: EDS mapping of selenium, yellow dotted circle:  $VSe_2$ , white dotted circle: Se particles, blue dotted circle:  $V_2Se_9$ )

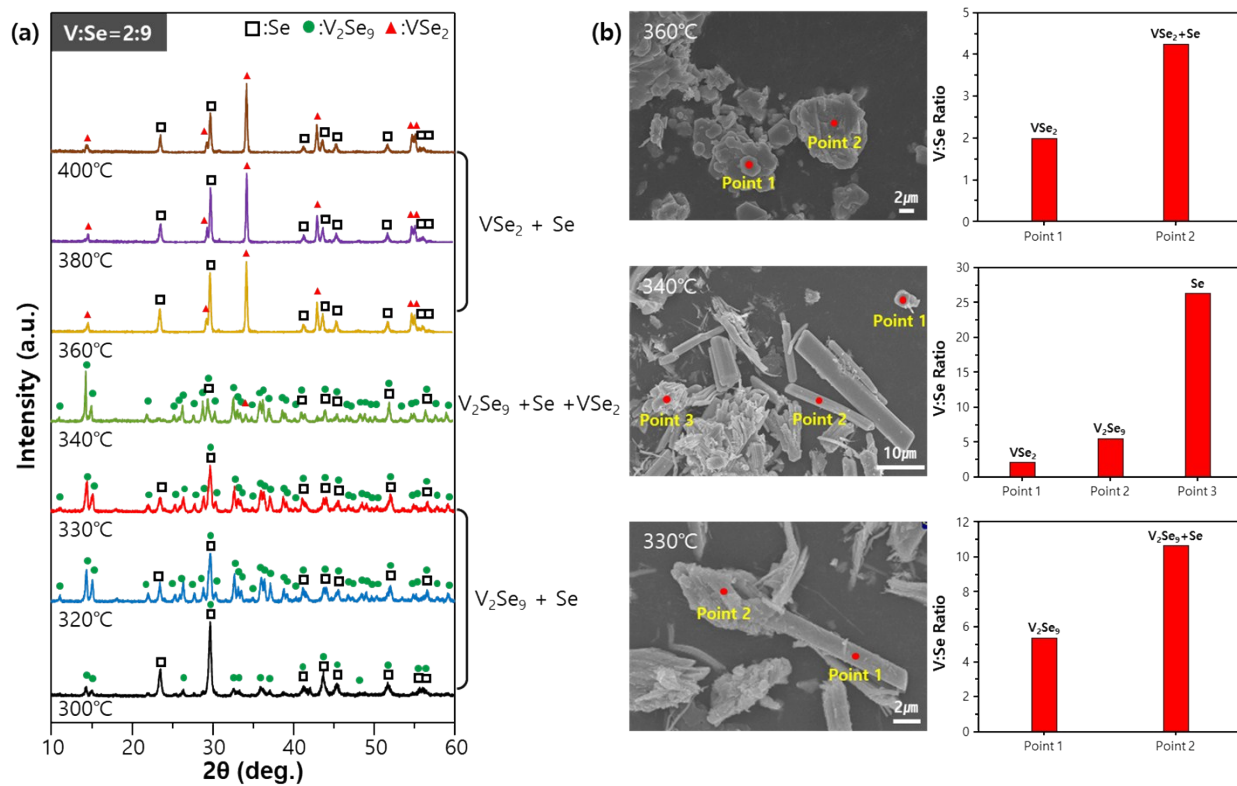

**Fig. S2** (a) XRD patterns and (b) SEM images (left) and EDS analysis (right) of as-synthesized samples with Temperature ranging from 300 °C to 400 °C. (V:Se ratio is 2:9)

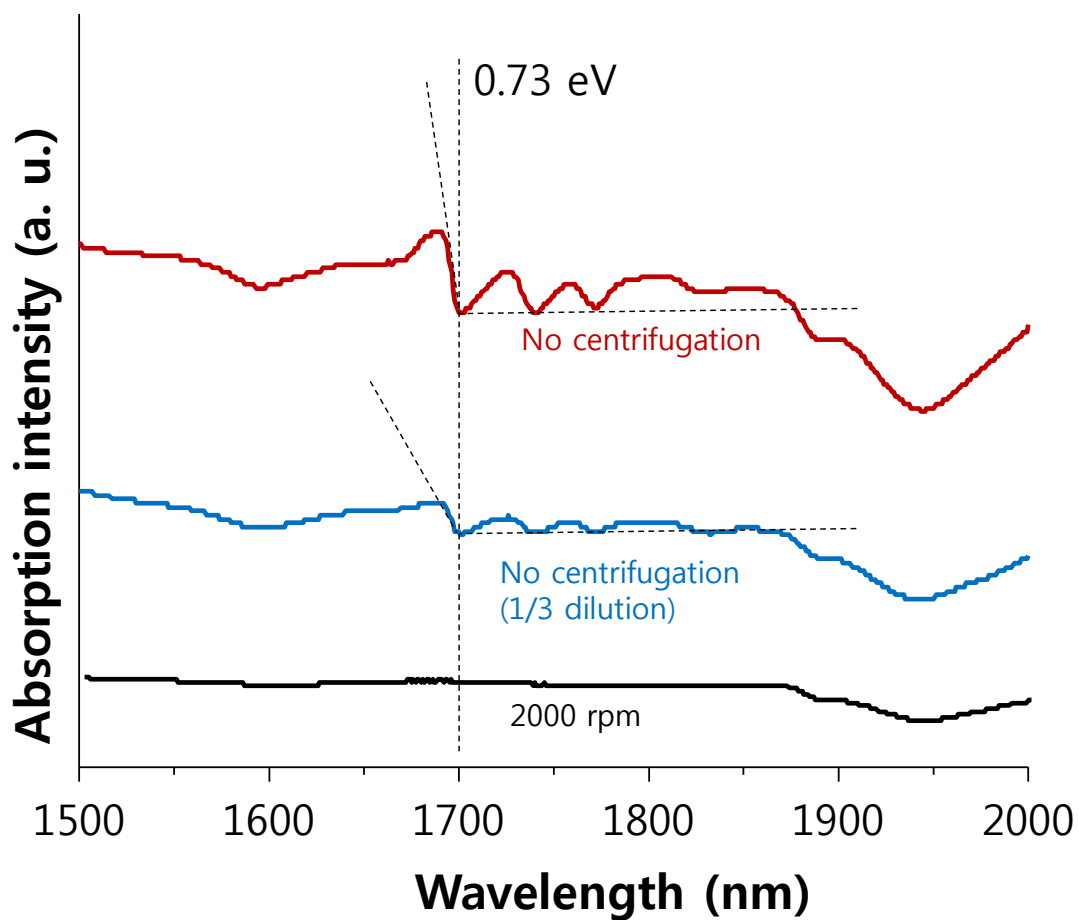

**Fig. S3** IR absorption spectrum of  $V_2Se_9$ . Red and blue spectrum indicates the absorption of  $V_2Se_9$  dispersed solution without centrifugation (blue: diluted solution which concentration is 1/3 of solution for red spectrum). Black spectrum is absorption of dispersed solution with centrifugation at 2000 rpm. The absorption peak around 1700 nm is due to the band gap known as 0.73 eV.
